# Supplementary material for: Cultural Sources of Strength and Resilience: A Case Study of Holistic Wellness Boxes for COVID-19 Response in Indigenous Communities
Source: Frontiers journal article supplement (doi:10.3389/fsoc.2021.612637), 2021-02-22
Supplement: Table_1.pdf [file Table_1.pdf]

## *Supplementary Material*

| Type of Resource                                                            | Content of Holistic Wellness Boxes                                                                                                   |
|-----------------------------------------------------------------------------|--------------------------------------------------------------------------------------------------------------------------------------|
| Resources to bring calm, relieve stress, and strengthen cultural connection | Sage for smudging                                                                                                                    |
|                                                                             | Ribbon featuring Ojibwe floral designs                                                                                               |
|                                                                             | Lavender essential oil                                                                                                               |
|                                                                             | Ojibwe Elder's teachings about dealing with anxiety and stress                                                                       |
|                                                                             | Mental health resource list                                                                                                          |
|                                                                             | Mindfulness exercises                                                                                                                |
| Resources to nourish body and spirit                                        | Wild rice                                                                                                                            |
|                                                                             | Recipes using traditional foods                                                                                                      |
| Resources to support the mental and physical health of children             | Our Smallest Warriors, Our Strongest Medicine: Overcoming COVID-19 children's book and coloring pages (Allison-Burbank et al., 2020) |
|                                                                             | Minwanjige, Mino-bimaadizi (Eat Well, Live Well) activity books about healthy eating (Kosobuski et al., 2020)                        |
|                                                                             | Crayons                                                                                                                              |
| Resources to prevent the spread of COVID-19                                 | Cloth mask                                                                                                                           |
|                                                                             | Bar soap and/or hand sanitizer                                                                                                       |

**Supplementary Table 1.** Contents of the holistic wellness boxes distributed by the Center for American Indian Health Great Lakes Hub

## References

- Allison-Burbank, J., Haroz, E. E., Ingalls, A., Kee, C., Martin, L., Masten, K, et al. (2020). *Our smallest warriors, our strongest medicine: overcoming COVID-19*. Baltimore, MD: The Johns Hopkins Center for American Indian Health.
- Kosobuski, A. W., King-Siert, R., Goodsky, T., Rodgers, J., and Thompson, H. (2020) *Minwanjige, Mino-bimaadizi (eat well, live well)*. Duluth, MN: University of Minnesota Medical School.
